# Supplementary material for: Comparison of Monkeypox Virus Clade Kinetics and Pathology within the Prairie Dog Animal Model Using a Serial Sacrifice Study Design
Source: Hindawi journal article supplement (doi:10.1155/2015/965710), 2015-01-01
Supplement: f1 [file 965710.f1.pdf]

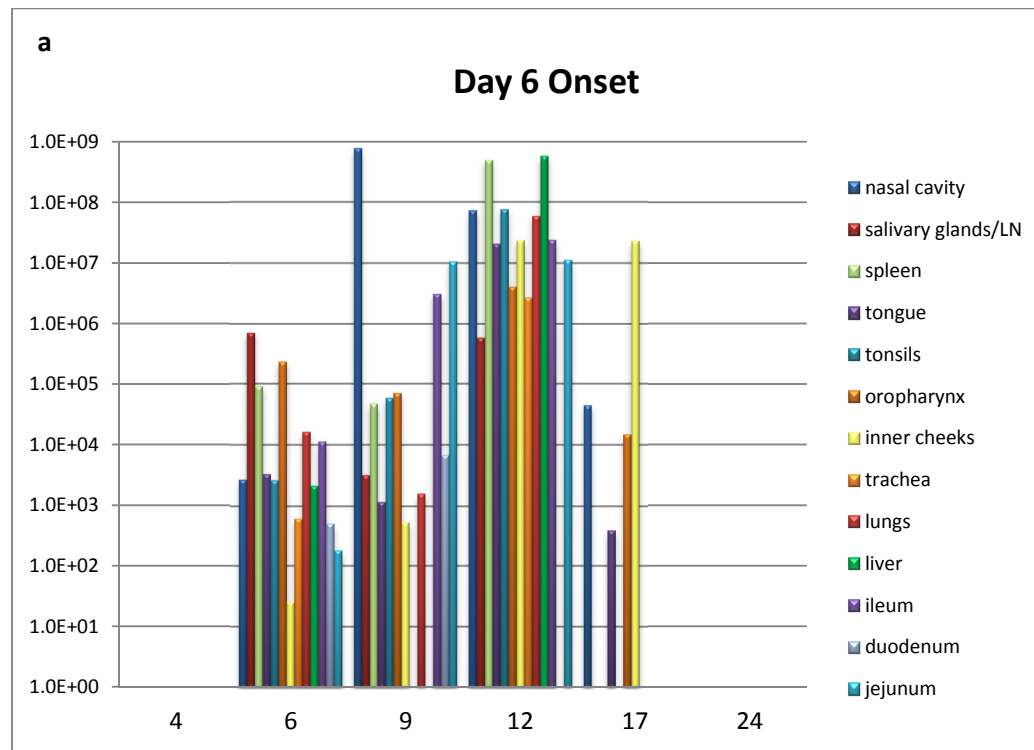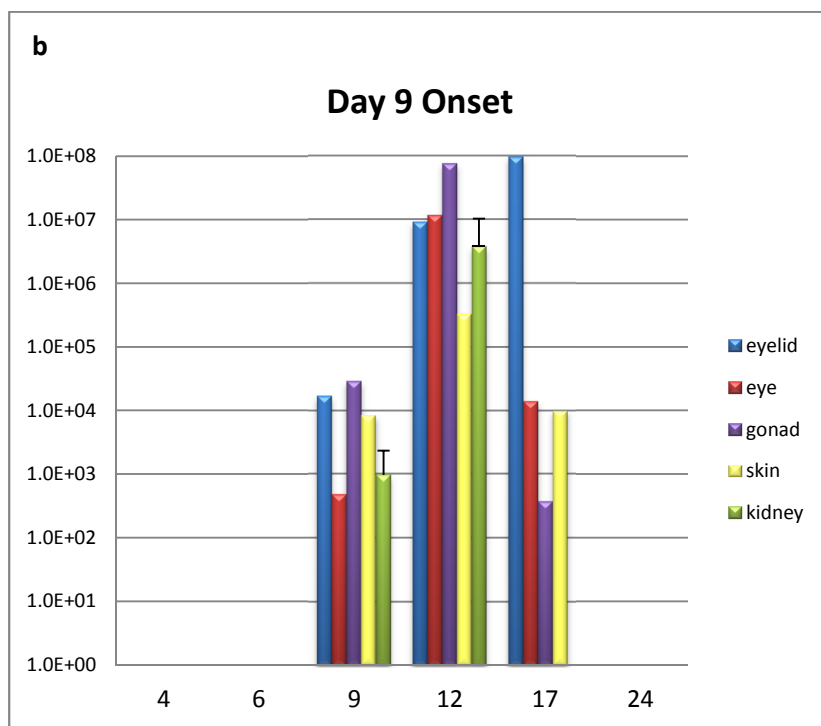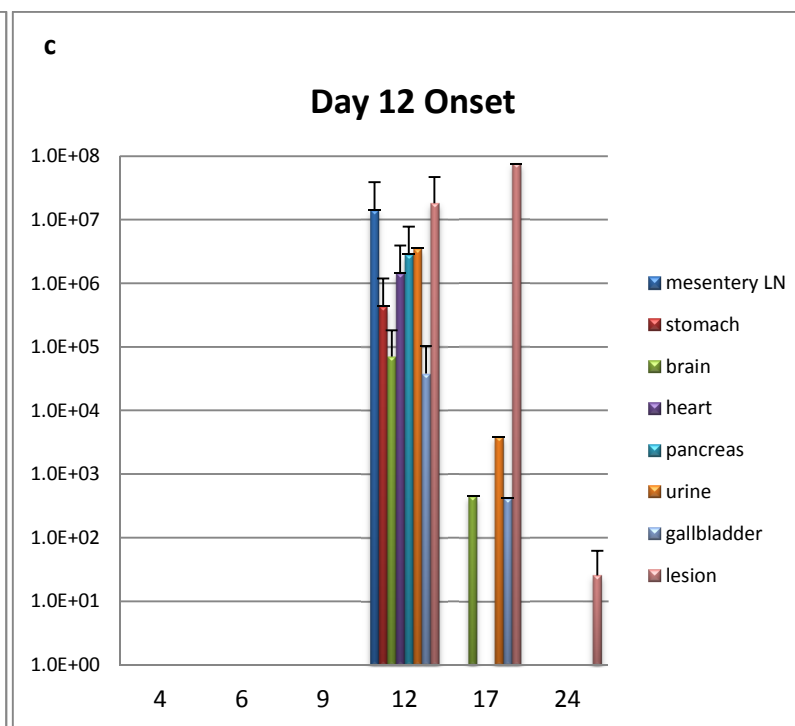

Supplementary Figure 1: Mean viral loads in tissues from prairie dogs intranasally challenged ( $8 \times 10^3$  pfu) with West African (WA) MPXV. Groups of prairie dogs were serially sacrificed (days 2, 4, 6, 9, 12, 17 and 24) following challenge. Samples were evaluated for the presence of virus and were grouped by initial detection of viable virus (day 6 (a), 9 (b), or 12 (c) p.i.). pfu/gram of tissue are shown on a log scale.

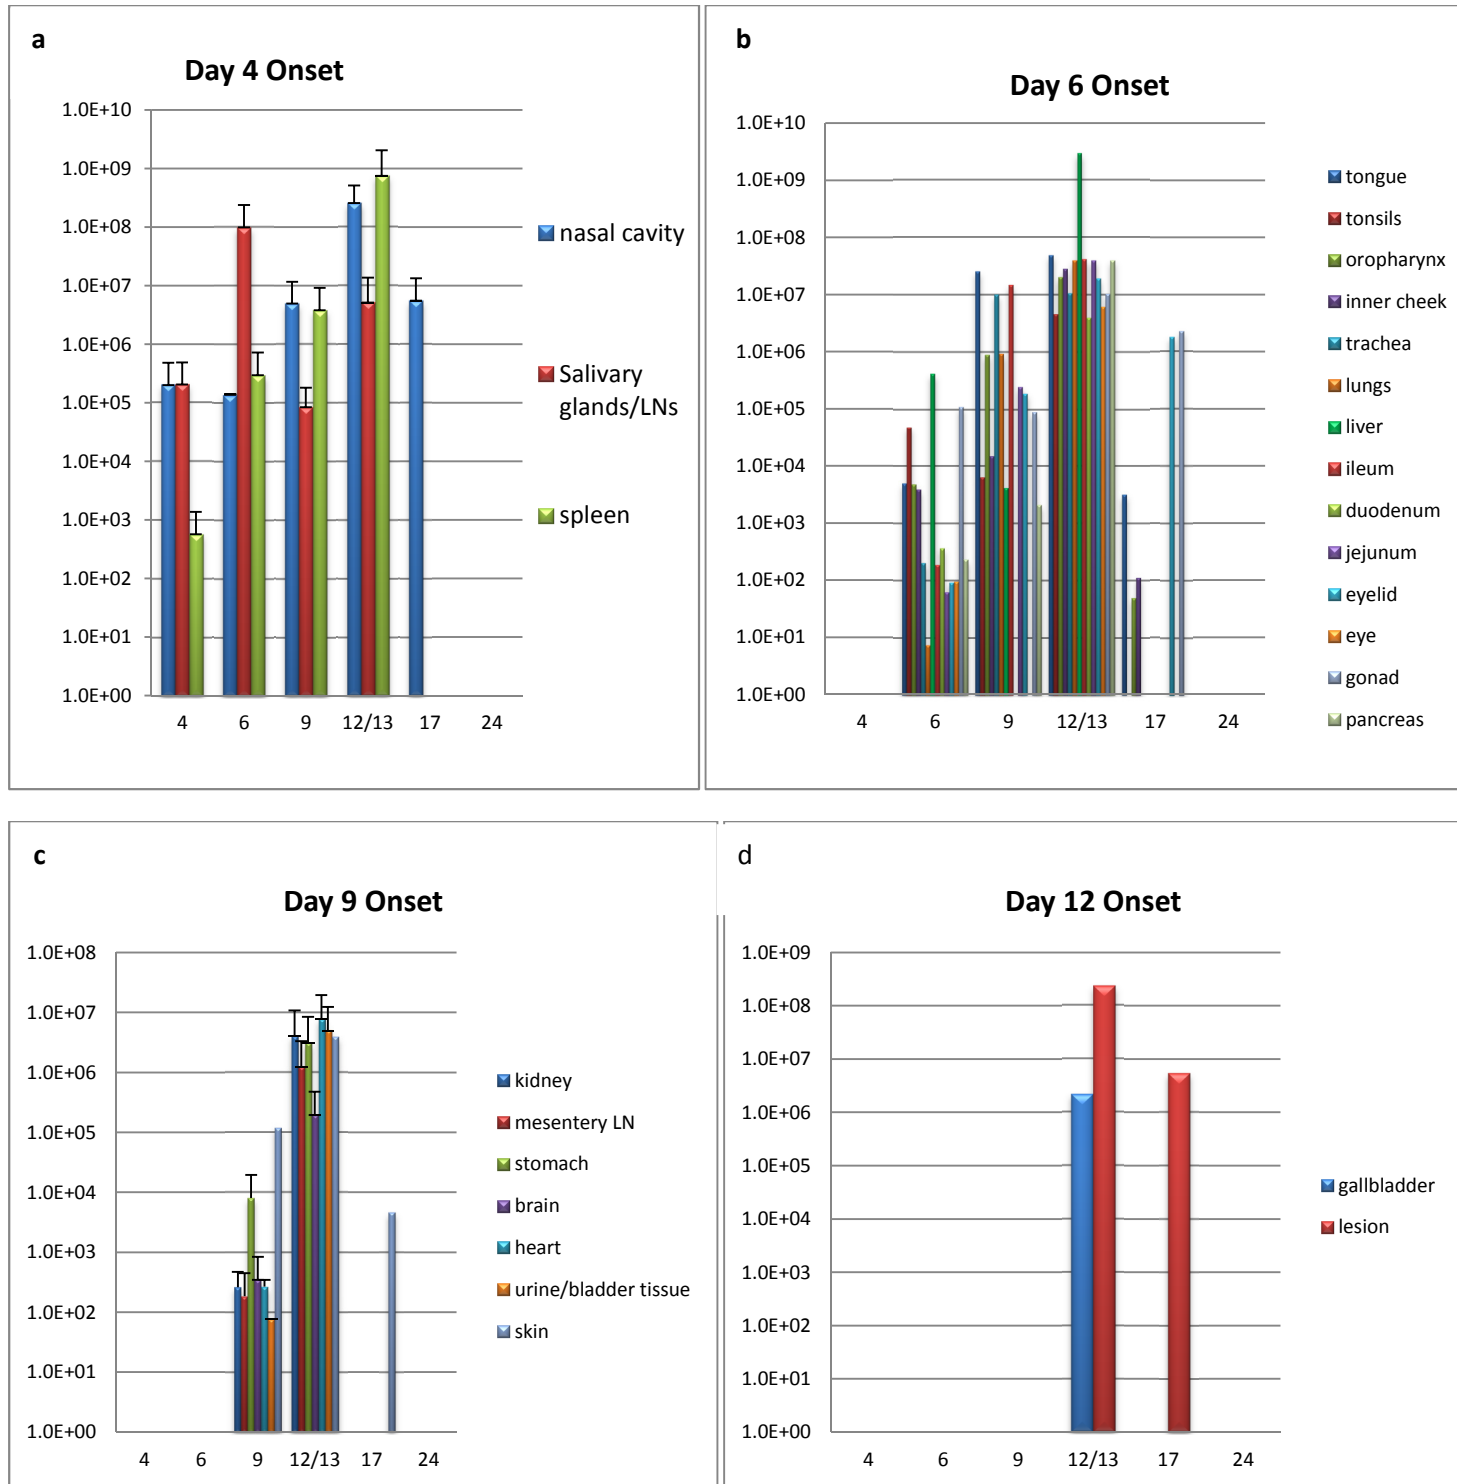

Supplementary Figure 2: Mean viral loads in tissues from prairie dogs intranasally challenged ( $8 \times 10^3$  pfu) with Congo Basin (CB) MPXV. Groups of prairie dogs were serially sacrificed (days 2, 4, 6, 9, 12, 17 and 24) following challenge. Samples were evaluated for the presence of virus and were grouped by initial detection of viable virus (day 4 (a), 6 (b), 9 (c) or 12 (d) p.i.). pfu/gram of tissue are shown on a log scale.

|      | (A) West African MPXV |         |        |         |         |        |     | (B) Congo Basin MPXV |        |         |         |         |         |         | (C) PBS      |     |         |         |     |         |     |
|------|-----------------------|---------|--------|---------|---------|--------|-----|----------------------|--------|---------|---------|---------|---------|---------|--------------|-----|---------|---------|-----|---------|-----|
|      | Necropsy day          |         |        |         |         |        |     | Necropsy day         |        |         |         |         |         |         | Necropsy day |     |         |         |     |         |     |
|      | 2                     | 4       | 6      | 9       | 12      | 17     | 24  | 2                    | 4      | 6       | 9       | 12      | 17      | 24      | 2            | 4   | 6       | 9       | 12  | 17      | 24  |
| NA   | 4.9%                  | 3.7%    | 2.1%   | -1.4%   | 1.4%    | -2.16% | n/a | 7.23%                | 2.98%  | -8.66%  | 0%      | -0.72%  | -2.57%  | -13.89% | n/a          | n/a | 6.62%   | 2.21%   | n/a | 0%      | n/a |
| K    | 63.9%                 | -1.7%   | 8.7%   | -28.2%  | 3.66%   | 1.71%  | n/a | 15.8%                | 30.87% | -42.86% | 42.7%   | 1.85%   | 2.17%   | -10.7%  | n/a          | n/a | 14.89%  | 35.42%  | n/a | 8.70%   | n/a |
| tCO2 | 1.79%                 | -9.2%   | n/a    | 6.06%   | n/a     | -1.2%  | n/a | 36.3%                | 8.14%  | 29.63%  | 0.21%   | -18.75% | -6.16%  | 0%      | n/a          | n/a | -5.88%  | 12.9%   | n/a | n/a     | n/a |
| CL   | -3.56%                | 8.77%   | n/a    | 3.75%   | n/a     | 2.5%   | n/a | 0%                   | 8.77%  | n/a     | 6.17%   | n/a     | 8.77%   | n/a     | n/a          | n/a | 7.59%   | 3.66%   | n/a | n/a     | n/a |
| GLU  | -76%                  | 36%     | 49.6%  | 16.35%  | 5.9%    | 69.58% | n/a | -50.93%              | 65.63% | 14.63%  | 12.09%  | 20.15%  | 24.48%  | 37.2%   | n/a          | n/a | 49.15%  | 22.64%  | n/a | -3.74%  | n/a |
| CA   | 10.05%                | -5.23%  | -0.94% | 30.67%  | -24.52% | -3.8%  | n/a | 30.42%               | 28.9%  | 45.92%  | -3.73%  | -5.94%  | -12.9%  | -13.4%  | n/a          | n/a | 0%      | -3.13%  | n/a | -15.84% | n/a |
| BUN  | 11.16%                | -2.5%   | -36.8% | 22.22%  | 10.55%  | -17.7% | n/a | 3.11%                | 10%    | -25%    | -4.55%  | 5.56%   | -4%     | 50%     | n/a          | n/a | 15%     | -11.11% | n/a | 8.70%   | n/a |
| CRE  | 12.5%                 | 6.1%    | -25%   | -22%    | -21.4%  | -23.6% | n/a | -4.44%               | 18.1%  | -37.5%  | 22.22%  | 12.5%   | 0%      | -55.56% | n/a          | n/a | 28.57%  | 28.57%  | n/a | -22.22% | n/a |
| ALP  | 26.6%                 | 8.84%   | 11.19% | -29.11% | 3.03%   | -36.9% | n/a | 17.82%               | 13.76% | 7.69%   | -6.52%  | -7.69%  | -39.22% | -49.06% | n/a          | n/a | 77.78%  | 22.73%  | n/a | -1.89%  | n/a |
| ALT  | -29.4%                | -25.8%  | 125%   | -30%    | 30%     | -20%   | n/a | -20.78%              | 15.18% | 12.78%  | 35.71%  | n/a     | -29.76% | n/a     | n/a          | n/a | -8.33%  | 75%     | n/a | -22.22% | n/a |
| AST  | 52.49%                | -75.97% | n/a    | -79.7%  | n/a     | -24.2% | n/a | 26.99%               | 35.36% | -21.43% | 35.36%  | -62.75% | -5.78%  | -8.70%  | n/a          | n/a | 0%      | -25%    | n/a | n/a     | n/a |
| TBIL | 8.3%                  | 25%     | -33.3% | 0       | 0       | 0      | n/a | 35.36%               | 8.33%  | -16.67% | -16.67% | 50      | 70.71%  | 0%      | n/a          | n/a | 0%      | 0%      | n/a | 0%      | n/a |
| ALB  | -4.7%                 | -12.88% | 68.4%  | -9.09%  | 38.7%   | -29.5% | n/a | -11.52%              | -2.5%  | 18.32%  | -10.44% | -22.27% | -61.22% | -30     | n/a          | n/a | -17.39% | -4.76%  | n/a | 52.4%   | n/a |
| TP   | -3.14%                | -8.23%  | -4.84% | -1.64%  | -5.54%  | 8.02%  | n/a | -8.93%               | -2.4%  | -12.48% | 3.38%   | -8.62%  | -21.46% | -11.67% | n/a          | n/a | -15.15% | -10.34% | n/a | -3.51%  | n/a |

**Supplementary Table 1: Mean Percent Change: (Day zero value - Necropsy day value)/Day zero value in blood chemistry values for prairie dogs experimentally infected with West African MPXV (A), Congo Basin MPXV (B) or PBS control animals (C).** The value change from day zero to necropsy for each blood chemistry was compared between groups. Wilcoxon rank-sum test p-values range from 0.1-1.0.

| LIVER APOPTOSIS   |                 |                                 |                   |                |                                 |
|-------------------|-----------------|---------------------------------|-------------------|----------------|---------------------------------|
| <u>PD#</u>        | <u>Day p.i</u>  | <u>Avg # of apoptotic cells</u> | <u>PD#</u>        | <u>Day p.i</u> | <u>Avg # of apoptotic cells</u> |
| PD2               | PBS             | 0.9±0.7                         | PD2               | PBS            | 0.9±0.7                         |
| <b>A. WAMPXV</b>  |                 |                                 | <b>B. CB MPXV</b> |                |                                 |
| PD11              | Day 4           | 1±0.6                           | PD25              | Day 4          | 6.2±4.5                         |
| PD12              | Day 4           | 0.7±0.6                         | PD26              | Day 4          | 1.1±0.7                         |
| PD13              | Day 6           | 4.4±2.0                         | PD27              | Day 6          | 4.6±3.3                         |
| PD14              | Day 6           | 5.3±2.9                         | PD28              | Day 6          | 2.8±1.8                         |
| PD15              | Day 9           | 10.1±11.0                       | PD29              | Day 9          | 7.9±5.0                         |
| PD16              | Day 9           | 0.8±1.0                         | PD30              | Day 9          | 4.7±3.6                         |
| PD21              | Day 12          | 6.9±4.0                         | PD32              | Day 12         | 3.6±1.3                         |
| SPLEEN APOPTOSIS  |                 |                                 |                   |                |                                 |
| <u>PD#</u>        | <u>Day p.i.</u> | <u>Avg # of apoptotic cells</u> | <u>PD#</u>        | <u>Day p.i</u> | <u>Avg # of apoptotic cells</u> |
| PD2               | PBS             | 3.4±1.6                         | PD2               | PBS            | 3.4±1.6                         |
| <b>C. WA MPXV</b> |                 |                                 | <b>D. CB MPXV</b> |                |                                 |
| PD11              | Day 4           | 1.6±1.0                         | PD25              | Day 4          | 1.5±1.5                         |
| PD12              | Day 4           | 1.4±1.5                         | PD26              | Day 4          | 2±1.9                           |
| PD13              | Day 6           | 10.7±7.8                        | PD27              | Day 6          | 17.2±10.0                       |
| PD14              | Day 6           | 8.7±5.0                         | PD28              | Day 6          | 12±7.2                          |
| PD15              | Day 9           | 17.3±8.4                        | PD29              | Day 9          | 22.1±8.7                        |
| PD16              | Day 9           | 15±4.3                          | PD30              | Day 9          | 34.9±13                         |
| PD21              | 127             | Day 12                          | 14.8±11.1         | Day 12         | TMTC (>100)                     |

Supplementary Table 2 : Number of apoptotic cells in liver and spleen from MPXV infected prairie dogs.  
Prairie dogs intranasally  
challenged ( $8 \times 10^3$  pfu) with West African (WA; A, C) or Congo Basin (CB; B, D) MPXV were serially  
sacrificed (days 2, 4, 6, 9, 12, 17 and 24)

following challenge. Paraffin-embedded prairie dog liver (A, B) and spleen (C, D) sections were stained with Millipore Apoptosis kit and apoptotic cells were counted. Counting of positive cells was performed by randomly moving each slide until 10 adjacent fields were counted; average positive cells  $\pm$  the standard deviation is shown. Apoptotic cells were identified by red-brown staining nucleus. (immunoperoxidase method, Vector NovaRed chromogen, hematoxylin counterstain).
